# Supplementary material
Source: publisher site journal article supplement (https://www.spandidos-publications.com/5169/downloadSupplementary)

Figure S1. Effects of GnRH agonist LA on the polarization of hypothalamic microglia treated for 12 h. Representative western blots of the protein expression levels of (A) TMEM119 and GnRHR and (B) CD86 and CD206. Protein expression levels of (C) TMEM119 and GnRHR and (D) CD86 and CD206 normalized to 0 mol/l LA. Data are presented as the mean  $\pm$  SE. # $P$ <0.05 vs. 0 mol/l LA, & $P$ <0.05 vs.  $10^{-12}$  mol/l LA, % $P$ <0.05 vs.  $10^{-10}$  mol/l LA. LA, leuprolide acetate; GnRHR, gonadotropin-releasing hormone receptor; TMEM119, transmembrane protein 119.

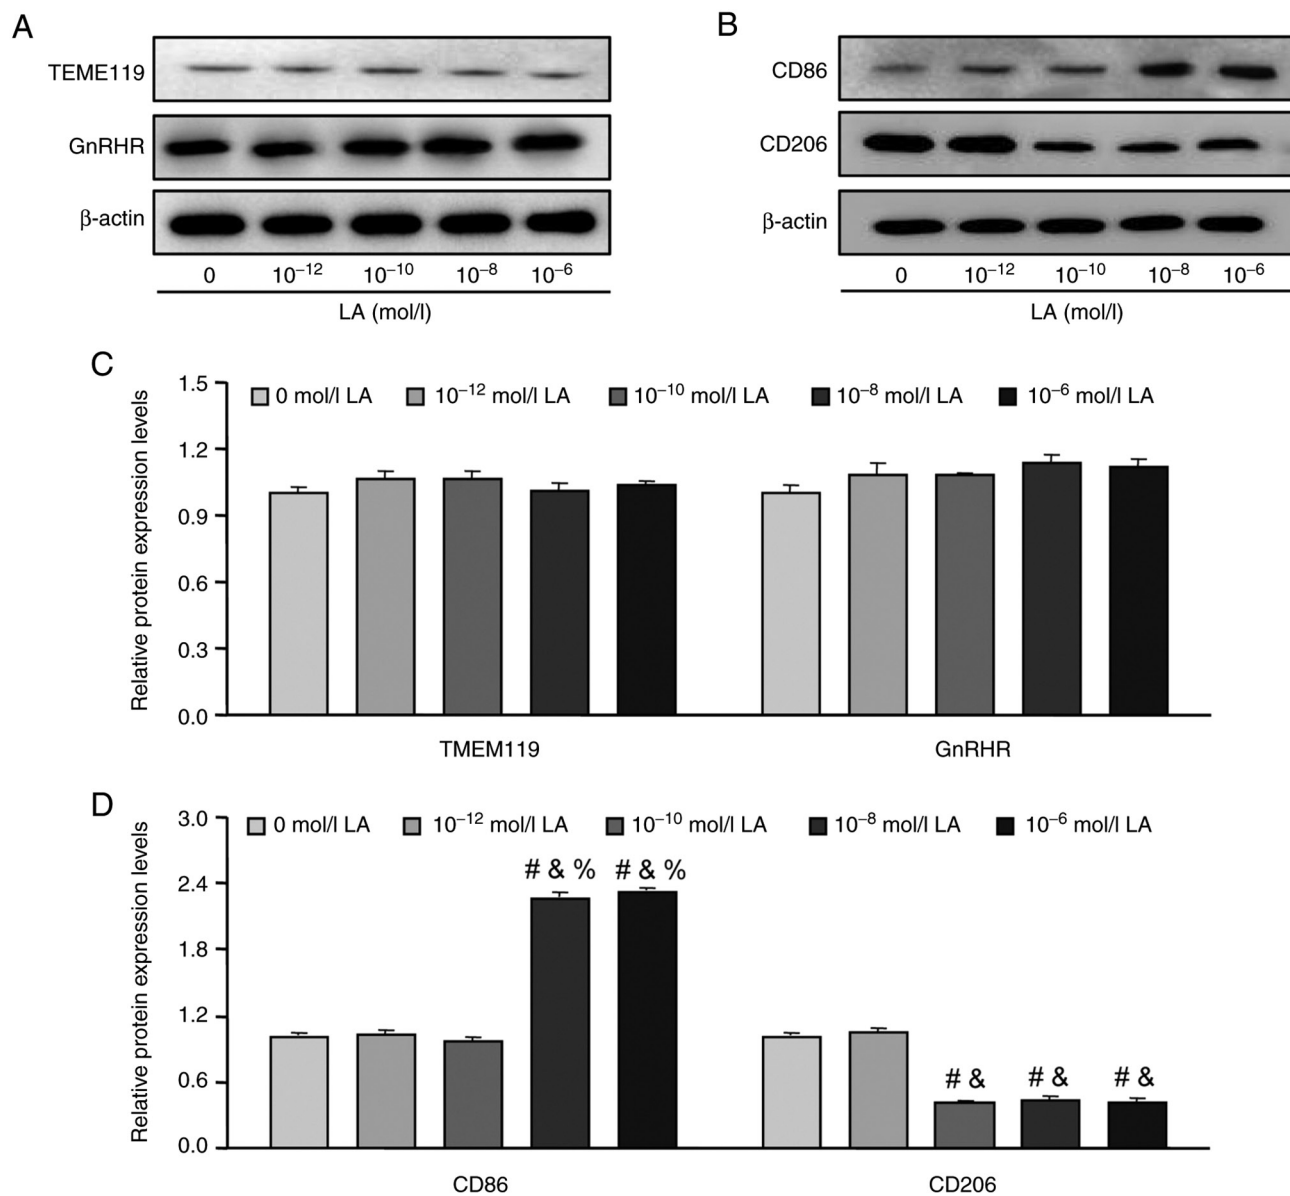

Figure S2. Effects of GnRH agonist LA on the polarization of hypothalamic microglia treated for 24 h. Representative western blots of the protein expression levels of (A) TMEM119 and GnRHR and (B) CD86 and CD206. Protein expression levels of (C) TMEM119 and GnRHR and (D) CD86 and CD206 normalized to 0 mol/l LA. Data are presented as the mean  $\pm$  SE. #P<0.05 vs. 0 mol/l LA, &P<0.05 vs. 10<sup>-12</sup> mol/l LA, %P<0.05 vs. 10<sup>-10</sup> mol/l LA. LA, leuprolide acetate; GnRHR, gonadotropin-releasing hormone receptor; TMEM119, transmembrane protein 119.

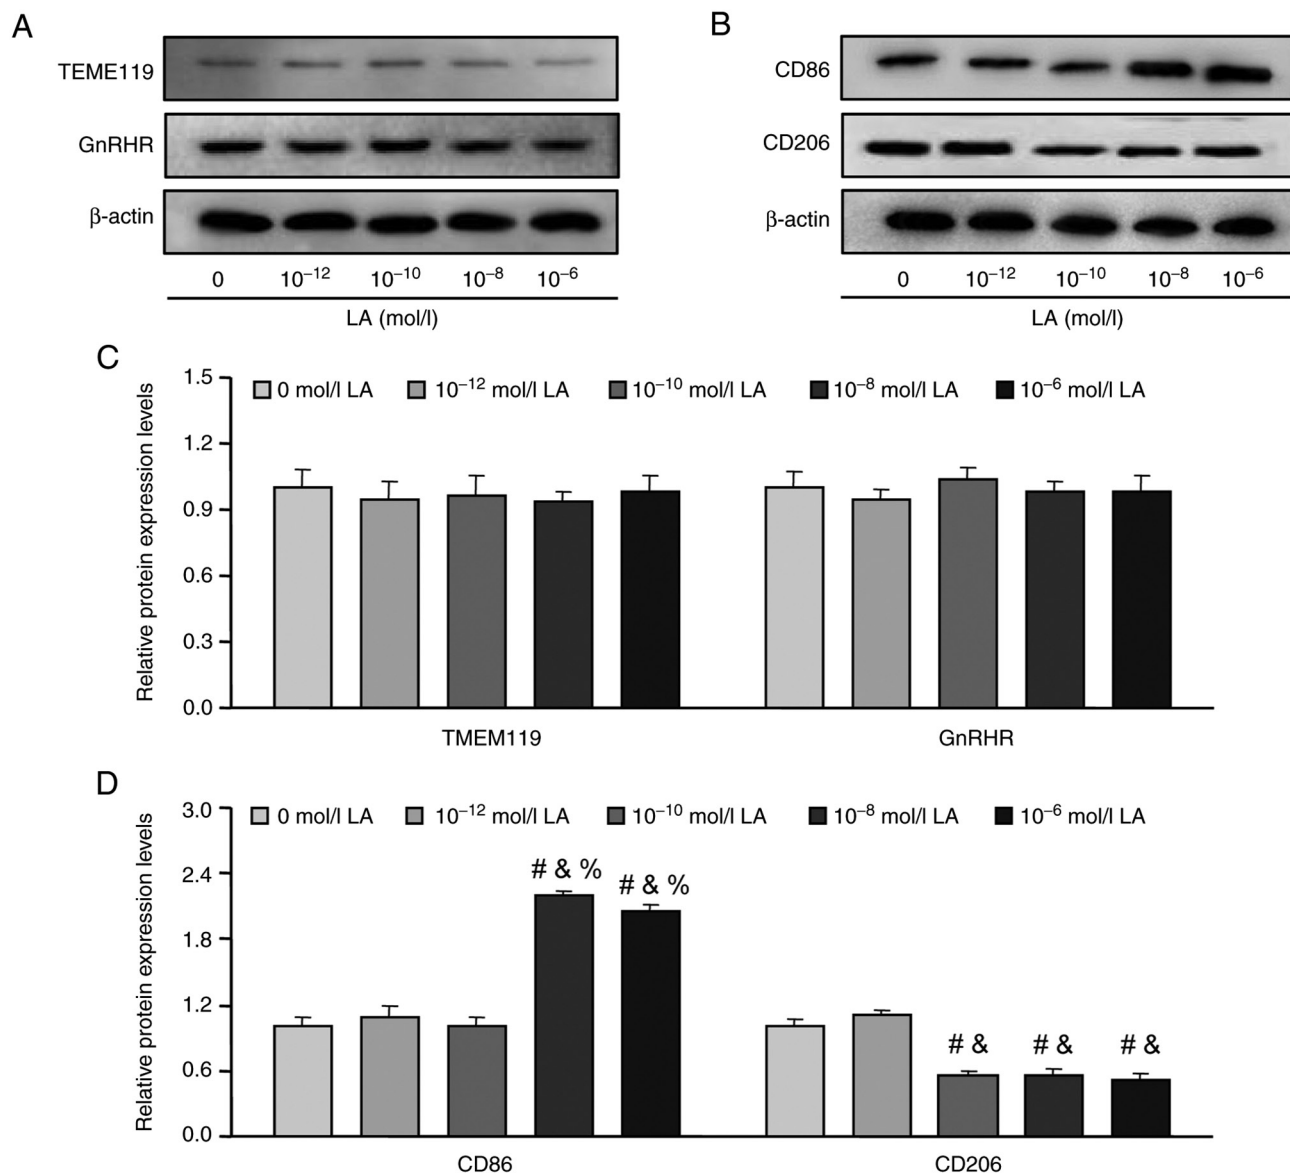

Supplement: Supplementary file 1 [file downloadSupplementary]
